# Supplementary material for: Biophysical models reveal the relative importance of transporter proteins and impermeant anions in chloride homeostasis
Source: eLife. 2018 Sep 27;7:e39575. doi: 10.7554/eLife.39575 (PMC6200395; doi:10.7554/eLife.39575)
Supplement: Figure 3—source data 1. — Resting membrane potential, EGABA and driving force at time points as indicated relative to addition of 1 mM furosemide (at time 0 min), for each experiment. [file elife-39575-fig3-data1.xlsx]

## Sheet: Sheet1
	GABA reversal potential - EGABA (mV)
	Exp ID	(-5min)	0min	5min	10min	15min
	141107(1)	-69.8848	-69.47	-68.629	-58.5311	-70.5876
	141107(2)	-88.4965	-88.6751	-65.7892	-74.7062	-62.7823
	151107	-71.1809	-71.6129	-60.1843	-55.5242	-64.0553
	50407	-68.4608	-68.9804	-63.6636	-46.4286	-49.6947
	60407	-78.894	-78.8018	-76.8836	-72.2177	-75.023
	20507	-86.3364	-87.3502	-81.7281	-80.0691	-77.3963
	40507	-80.0749	-81.1118	-77.068	-77.8456	-71.2615
	270407	-73.4332	-73.6175	-64.1244	-69.6659	-67.1083
	300407	-88.8076	-89.712	-86.2154	-87.8744	-79.3721
	Resting membrane potential - Rm (mV)
	Exp ID	(-5min)	0min	5min	10min	15min
	141107(1)	-68.6341	-70.9273	-73.9266	-73.916	-74.9218
	141107(2)	-71.6096	-71.91	-85.9908	-84.7725	-83.1948
	151107	-79.4172	-78.8112	-79.0109	-80.0687	-80.3456
	50407	-66.65	-66.8533	-65.4533	-63.7035	-64.0671
	60407	-77.2132	-74.7506	-74.1678	-73.2743	-73.0033
	20507	-67.1011	-67.8312	-67.7257	-66.3342	-65.0269
	40507	-61.295	-60.2143	-60.2287	-60.1304	-59.3034
	270407	-67.2536	-66.8829	-65.7554	-65.3489	-65.153
	300407	-71.5385	-71.1307	-71.3202	-71.2763	-70.8289
	Driving force - DF (mV)
	Exp ID	(-5min)	0	5min	10min	15min
	141107(1)	1.2507	-1.4573	-5.2976	-15.3849	-4.3342
	141107(2)	16.8869	16.7651	-20.2016	-10.0663	-20.4125
	151107	-8.2363	-7.1983	-18.8266	-24.5445	-16.2903
	50407	8.8108	2.1271	-1.7897	-17.2749	-14.3724
	60407	1.6808	4.0512	2.7158	-1.0566	2.0197
	20507	19.2353	19.519	14.0024	13.7349	12.3694
	40507	18.7799	20.8975	16.8393	17.7152	11.9581
	270407	6.1796	6.7346	-1.631	4.317	1.9553
	300407	17.2691	18.5813	14.8952	16.5981	8.5432
