# Supplementary material for: Biophysical models reveal the relative importance of transporter proteins and impermeant anions in chloride homeostasis
Source: eLife. 2018 Sep 27;7:e39575. doi: 10.7554/eLife.39575 (PMC6200395; doi:10.7554/eLife.39575)
Supplement: Figure 5—source data 1. — Resting membrane potential, EGABA and driving force at time points as indicated relative to electroporation of anionic dextran (at time 0 min), for each experiment. [file elife-39575-fig5-data1.xlsx]

## Sheet: Sheet1
		GABA reversal potential - EGABA (mV)
	Exp ID	0	5min	10min	15min
	18032203	-67.8567	-77.1043	-73.4749	-79.3093
	18032202	-72.7172	-77.4909	-76.9614	-77.7954
	18032002	-75.1973	-79.771	-80.7043	-81.4467
	18032302	-77.6416	-78.7498	-83.9871	-84.865
	18032303	-75.7351	-79.5224	-79.4705	-79.1095
	18032304	-65.5293	-70.8904	-68.2349	-69.5794
		Resting membrane potential - Rm (mV)
	Exp ID	0	5min	10min	15min
	18032203	-75.3901	-82.2528	-81.2048	-84.8332
	18032202	-55.9343	-66.5085	-63.3669	-62.5967
	18032002	-54.6495	-63.954	-63.8116	-63.6116
	18032302	-76.2677	-81.1991	-80.9566	-79.4489
	18032303	-73.1791	-75.9535	-70.0301	-69.6216
	18032304	-66.2914	-73.881	-69.9428	-70.4231
		Driving force - DF (mV)
	Exp ID	0	5min	10min	15min
	18032203	-7.5334	-5.1485	-7.7299	-5.5239
	18032202	16.7829	10.9824	13.5945	15.1987
	18032002	20.5478	15.817	16.8927	17.8351
	18032302	1.3739	-2.4493	3.0305	5.4161
	18032303	2.556	3.5689	9.4404	9.4879
	18032304	-0.7621	-2.9906	-1.7079	-0.8437
